# Supplementary material
Source: PubMed Central journal article supplement (PMC2544552)
Supplement: 0804438105_0804438105SI.pdf [file 0804438105_0804438105SI.pdf]

# Supporting Information

Li et al. 10.1073/pnas.0804438105

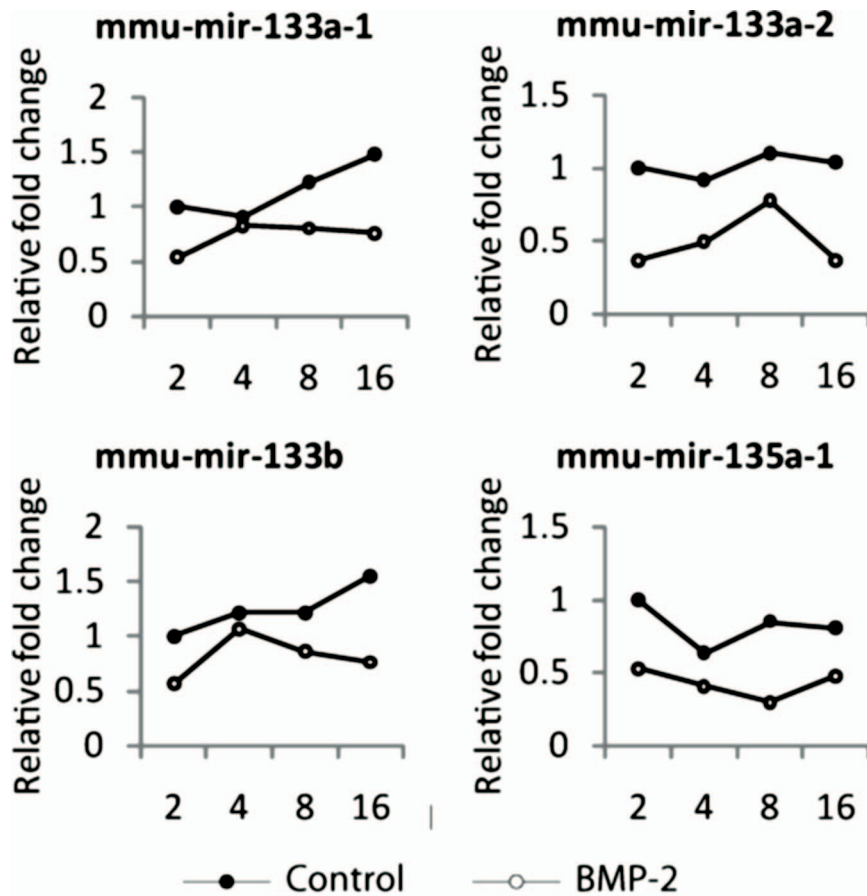

miR-133a uuggucccuucaaccagcugu

miR-133b uuggucccuucaaccagcua

Seed sequence is underlined.  
Mismatched bases are in red.

**Fig. S1.** Expression profile of miR-133 precursors (mmu-mir-133a-1, mmu-mir-133a-2 and mmu-mir-133b) and miR-135a precursor (mmu-mir-135a-1) during BMP2-induced C2C12 osteogenic differentiation. For each time point, the relative fold change of each miRNA precursor was gotten by normalizing 2 power value of fluorescence with 2 power value of fluorescence at 2h in Control. See *Materials and Methods* for miRNA microarray analysis. We also note that miR-133a-1 and miR-133a-2 generate the same mature miR-133a. Both miR-133a and miR-133b have the same seed sequence and differ by a two-nucleotide change outside seed region.

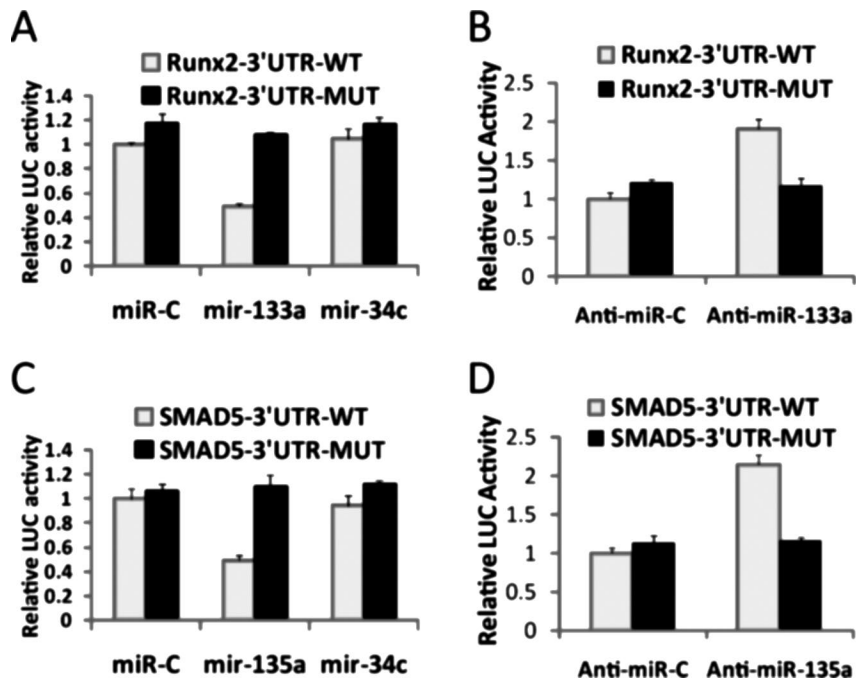

**Fig. S2.** Effect of pre-miRs and Anti-miRs on 3' UTR reporter activities of targets in C2C12 cells. (A) C2C12 cells were co-transfected with the luciferase reporters carrying wild-type Runx2 3' UTR or mutated Runx2 3' UTR, phRL-null and 100 nM RNA oligonucleotides of miR-Control (miR-C), the miR-133a or miR-34c as an irrelevant control. Effects of miR-133a and control miRNAs on the reporter constructs were shown after 36 h. The ratio of reporter (*Firefly*) to control phRL-null plasmid (*Renilla*) in relative luminescence units was plotted. Error bars represent the standard error for  $n = 3$ . (B) C2C12 cells were co-transfected with the luciferase reporters, phRL-null and 100 nM RNA oligonucleotides of Anti-miR-Control (miR-C) or the Anti-miR-133a. Functional activity of the luciferase reporter plasmid was assessed as described above in panel A. Error bars represent the standard error for  $n = 3$ . (C) Functional activity of the luciferase reporter plasmid carrying wild-type or mutated Smad5 3' UTR was assessed as described above in panel A. Error bars represent the standard error for  $n = 3$ . (D) Functional activity of the luciferase reporter plasmid carrying wild-type or mutated Smad5 3' UTR was assessed as described above in panel B. Error bars represent the standard error for  $n = 3$ .



**Table S1. Antibodies used for Western blot analysis**

| Antibody       | Source            | Dilution for application | Company                         |
|----------------|-------------------|--------------------------|---------------------------------|
| Runx2          | Mouse monoclonal  | 1:2,000                  | R & D Systems                   |
| SMAD5          | Goat polyclonal   | 1:2,000                  | Santa Cruz Biotechnology, Inc.  |
| p-Smad1/5      | Rabbit monoclonal | 1:1,000                  | Cell Signaling Technology, Inc. |
| p27            | Mouse monoclonal  | 1:2,000                  | Santa Cruz Biotechnology, Inc.  |
| MyoD           | Rabbit polyclonal | 1:2,000                  | Santa Cruz Biotechnology, Inc.  |
| Lamin B1       | Mouse monoclonal  | 1:5,000                  | Zymo Research Corp.             |
| $\beta$ -actin | Goat polyclonal   | 1:5,000                  | Santa Cruz Biotechnology, Inc.  |

**Table S2. Nucleotide sequences of primers used for quantitative RT-PCR detection**

| Gene                 | Primer Sequences                                                                |
|----------------------|---------------------------------------------------------------------------------|
| Runx2                | 5'-CGCCCCTCCCTGAACTCT-3' (Forward)<br>5'-TGCCTGCCTGGGATCTGTA-3' (Reverse)       |
| Alkaline phosphatase | 5'-TTGTGCGAGAGAAAGGAGA-3' (Forward)<br>5'-GTTTCAGGGCATTTCATCAAGGT-3' (Reverse)  |
| Osteocalcin          | 5'-CTGACAAAGCCTTCATGTCCAA-3' (Forward)<br>5'-GCGCCGGAGTCTGTTCACCTA-3' (Reverse) |
| Fibromodulin         | 5'-CCTCTGTCAACACCAACT-3' (Forward)<br>5'-GAAGTTCATGACGTCCACCA-3' (Reverse)      |
| Myogenin             | 5'-AGTGAATGCAACTCCACAG-3' (Forward)<br>5'-ACGATGGACGTAAGGGAGTG-3' (Reverse)     |
| Cadherin 15          | 5'-CCCATCTGACATTGCCAACT-3' (Forward)<br>5'-CAGAGCCATCTCCCTCGTAG-3' (Reverse)    |
| Hist2H4*             | 5'-CCAGCTGGTGTTCAGATTACA-3' (Forward)<br>5'-ACCCTTGCCTAGACCCTTTC-3' (Reverse)   |
| SMAD5                | 5'-AGATGG CCCCAGATAATTCC-3' (Forward)<br>5'-ACCAGTGTGGGCTCCTC-3' (Reverse)      |
| Hoxa10               | 5'-CTCTCCGGAGAAGGACTC-3' (Forward)<br>5'-TCTTTGCTGTGAGCCAGTTG-3' (Reverse)      |
| HPRT                 | 5'-CAGGCCAGACTTTGTTGGAT-3' (Forward)<br>5'-TTGCGCTCATTTAGGCTTT-3' (Reverse)     |

\*Mouse homologue of the human H4/n histone gene [Braastad CD et al. (2004) Functional characterization of a human histone gene cluster duplication. *Proc Natl Acad Sci USA* 342:35–40].

**Table S3. Nucleotide sequences of probes for Northern blot analysis**

| miRNA   | Probe sequence                |
|---------|-------------------------------|
| miR-133 | 5'-ACAGCTGGTTGAAGGGGACCAA-3'  |
| miR-135 | 5'-ACAGCTGGTTGAAGGGGACCAA-3'  |
| miR-181 | 5'-ACTCACCGACAGCGTTGAATGTT-3' |
| U6      | 5'-ACAGCTGGTTGAAGGGGACCAA-3'  |

**Table S4. Nucleotide sequences of primers for construct and mutation of plasmids**

| Gene                       | Primer sequences                                      |
|----------------------------|-------------------------------------------------------|
| WT Runx2 sense             | 5'-GCTCTAGAGCCCAGAATGATGGTGTGACG-3'                   |
| WT Runx2 anti-sense        | 5'-GGCCGGCCCTGCCTTTGTCCCTTCTG-3'                      |
| Mutagenic Runx2 sense      | 5'-GGCCCAAGTGGCATGGTCGACACATCCCGCATGTG-3'             |
| Mutagenic Runx2 anti-sense | 5'-CACATGCGGGATGTGTCGACCATGCCACTGGGCC-3'              |
| WT Smad5 sense             | 5'-GCTCTAGAGCTAAAGCATGGGGAGCCTTAG-3'                  |
| WT Smad5 anti-sense        | 5'-GGCCGGCCCTTTAAGCAGATTTTGAGGTTTATT-3'               |
| Mutagenic Smad5 sense      | 5'-GGTTTTACTGTATTGTGCTCTCACAGGCCTAACTCTAAGAAATTTGG-3' |
| Mutagenic Smad5 anti-sense | 5'-CCAAATTTCTAAGAGTTAGGCCTGTGAGAGCACAATACAGTAAAACC-3' |
